# Supplementary material for: Multi-stimuli responsive supramolecular gels based on a D–π–A structural cyanostilbene derivative with aggregation induced emission properties
Source: Royal Society of Chemistry journal article supplement (doi:10.1039/c8sm02434k), 2019-01-01
Supplement: c8sm02434k1.pdf [file c8sm02434k1.pdf]

## Supporting Information

# Multi-stimuli Responsive Supramolecular Gels Based on a D- $\pi$ -A Structural Cyanostilbene Derivative with Aggregation Induced Emission Properties

Xiaoxu Wang, Zeyang Ding, Yao Ma, Yuping Zhang, Hongxing Shang and Shimei Jiang\*

State Key Laboratory of Supramolecular Structure and Materials, College of Chemistry, Jilin University, 2699 Qianjin Avenue, Changchun 130012, P. R. China.

E-mail: smjiang@jlu.edu.cn

## Content

Fig. S1  $^1\text{H}$  NMR spectrum of **BAPBIA**.

Fig. S2  $^{13}\text{C}$  NMR spectrum of **BAPBIA**.

Fig. S3 MALDI-TOF mass spectrum of **BAPBIA**.

Fig. S4 (a) Normalized absorption and (b) Lippert-Mataga plot of **BAPBIA** in solvents with different polarities.

Fig. S5 X-ray powder diffraction patterns of **BAPBIA** in xerogel state.

Fig. S6 (a) Three isomers (*Z,Z*, *Z,E* and *E,E* isomers), (b) amplifying  $^1\text{H}$  NMR spectra of proton peaks near amide bonds ( $\text{H}_a$ ) of **BAPBIA** and (c) varied fractions of all three isomers during continuous UV irradiation.

Fig. S7 Emission spectra of **BAPBIA** gel before and after UV irradiation.

Fig. S8 (a)  $^1\text{H}$  NMR spectra of **BAPBIA** (a) before UV irradiation; (b) upon UV irradiation; (c) upon UV irradiation and then heating.

Fig. S9 Emission spectra of **BAPBIA** gel before and after adding 1 equiv. TBAF.

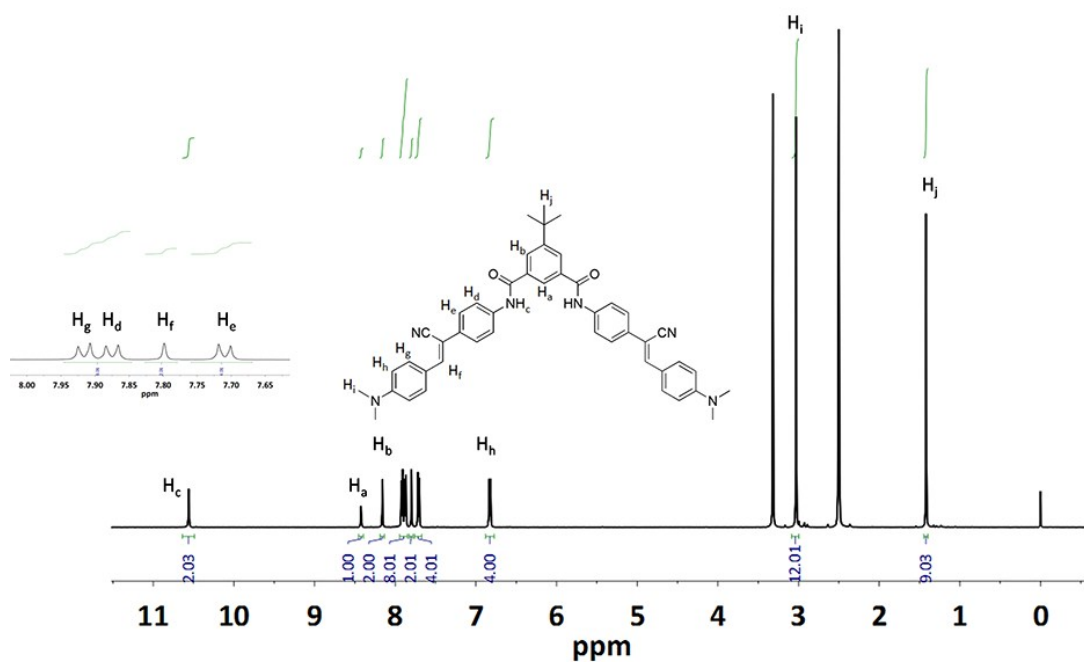

Fig. S1  $^1\text{H}$  NMR spectrum of BAPBIA.

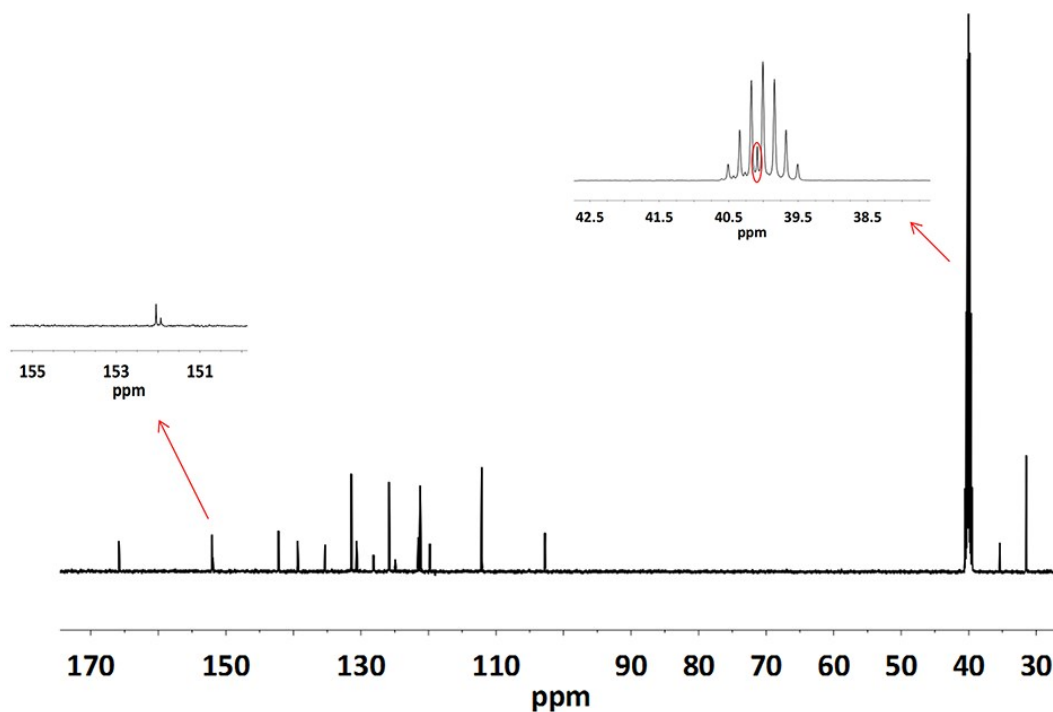

Fig. S2  $^{13}\text{C}$  NMR spectrum of BAPBIA.

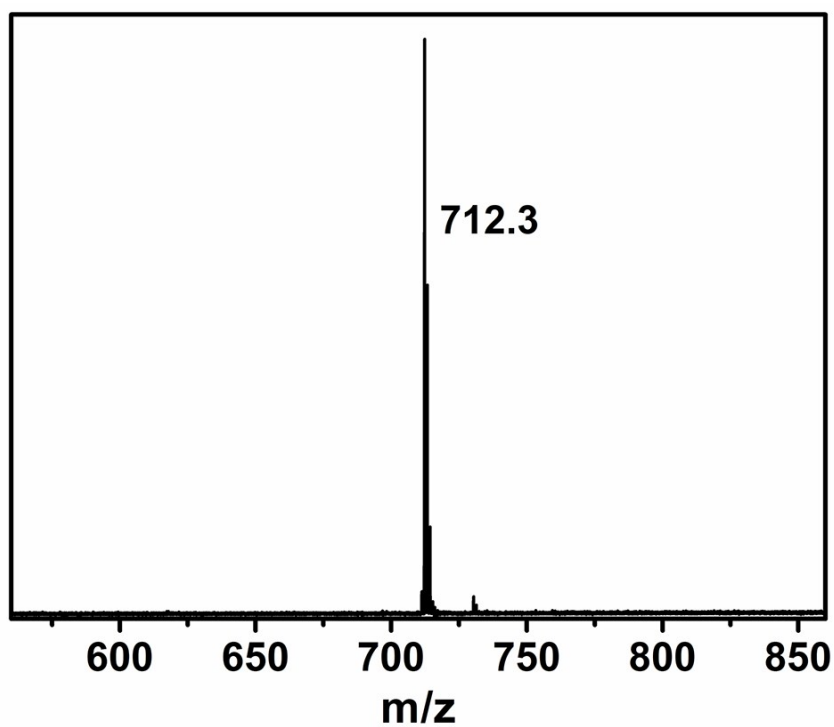

Fig. S3 MALDI-TOF mass spectrum of **BAPBIA**.

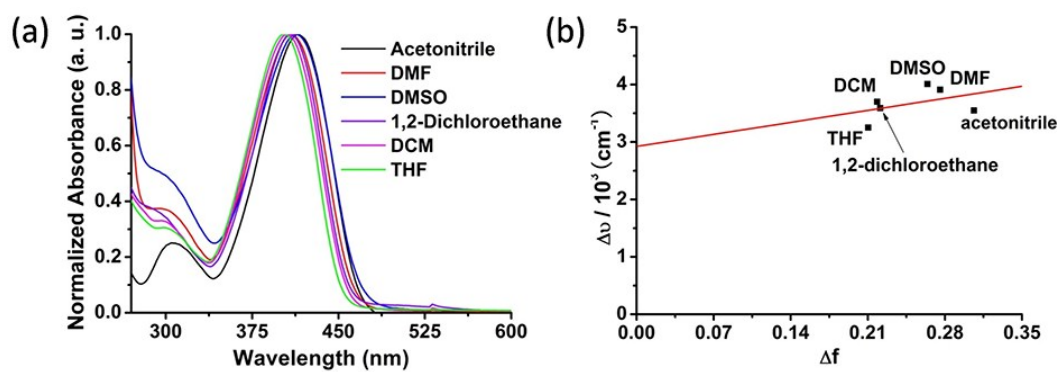

Fig. S4 (a) Normalized absorption and (b) Lippert-Mataga plot of **BAPBIA** in solvents with different polarities ( $1 \times 10^{-5} \text{ M}$ ,  $\lambda_{\text{ex}} = 400 \text{ nm}$ ).

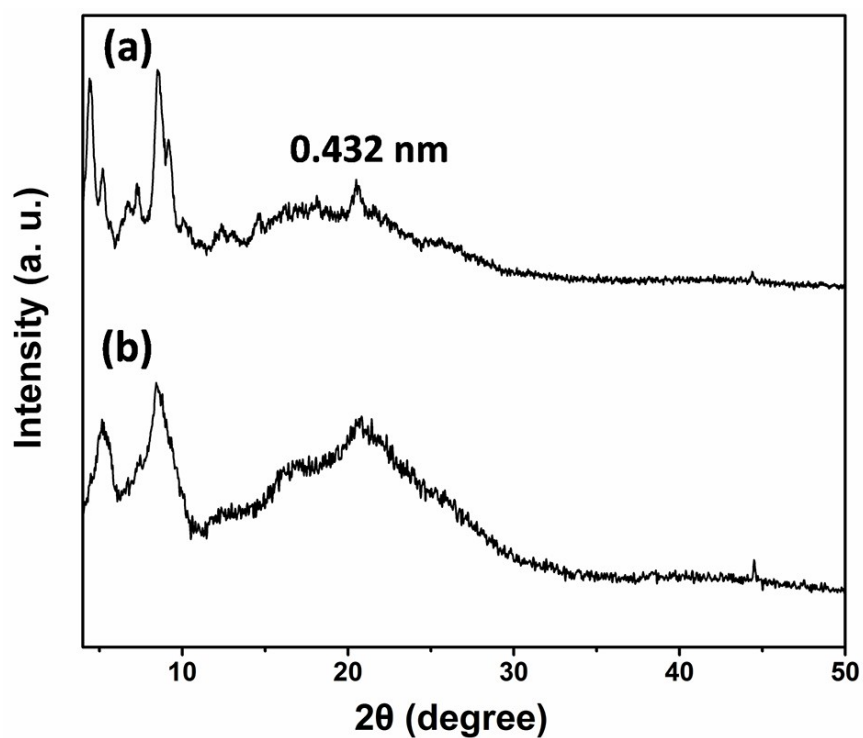

Fig. S5 X-ray powder diffraction patterns of **BAPBIA**: (a) xerogel obtained from acetonitrile and (b) xerogel obtained from DCM.

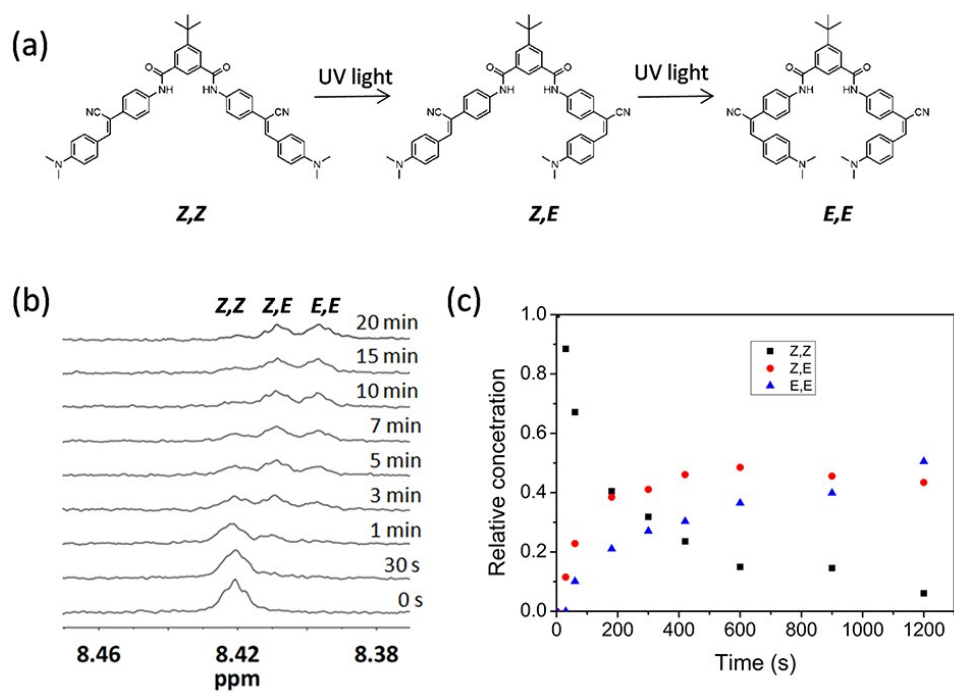

Fig. S6 (a) Three isomers (*Z,Z*, *Z,E* and *E,E* isomers), (b) amplifying  $^1\text{H}$  NMR spectra of proton peaks near amide bonds ( $\text{H}_a$ ) of **BAPBIA** and (c) varied fractions of all three isomers during continuous UV irradiation in  $\text{DMSO-}d_6$  solution.

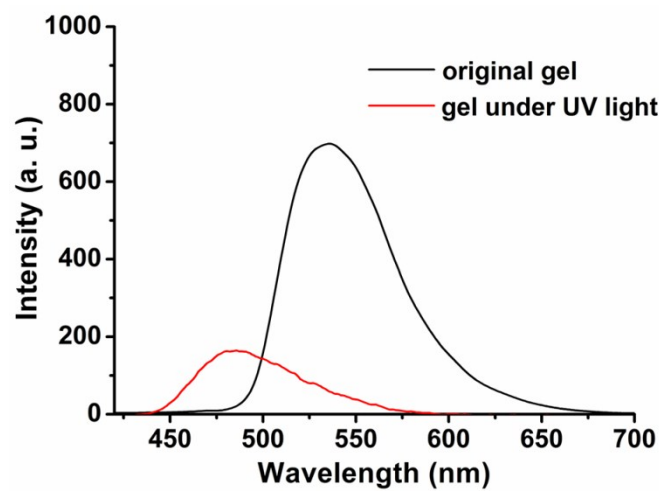

Fig. S7 Emission spectra of **BAPBIA** gel (8 mg/ml) before and after UV irradiation ( $\lambda_{\text{ex}} = 400$  nm).

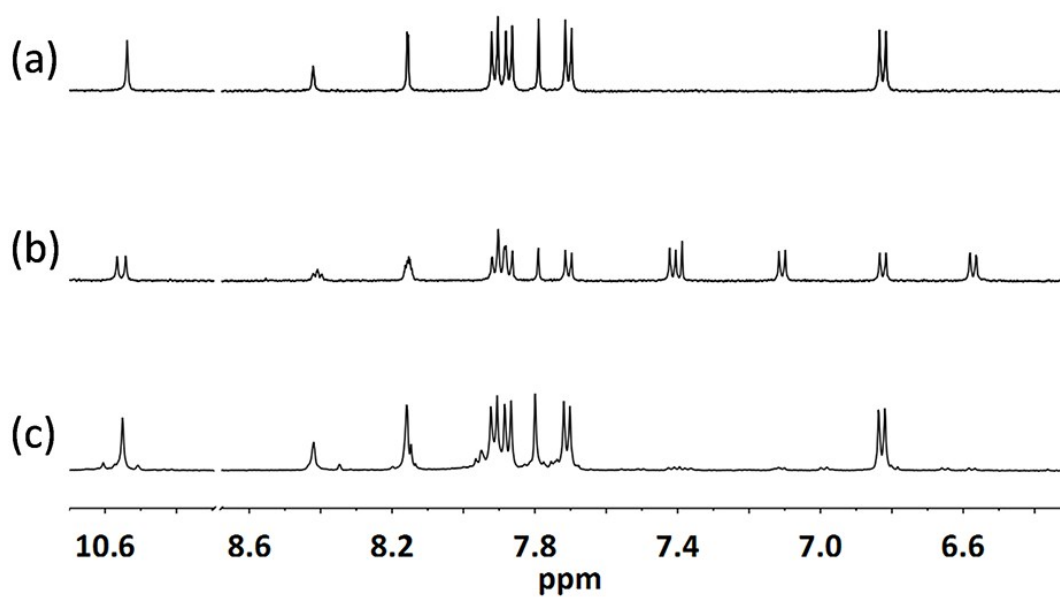

Fig. S8 (a)  $^1\text{H}$  NMR spectra of **BAPBIA** ( $1 \times 10^{-3}$  M) in  $\text{DMSO}-d_6$  (a) before UV irradiation; (b) upon UV irradiation at 365 nm for 5 minutes; (c) upon UV irradiation at 365 nm for 5 minutes and then heating at 348 K for three days.

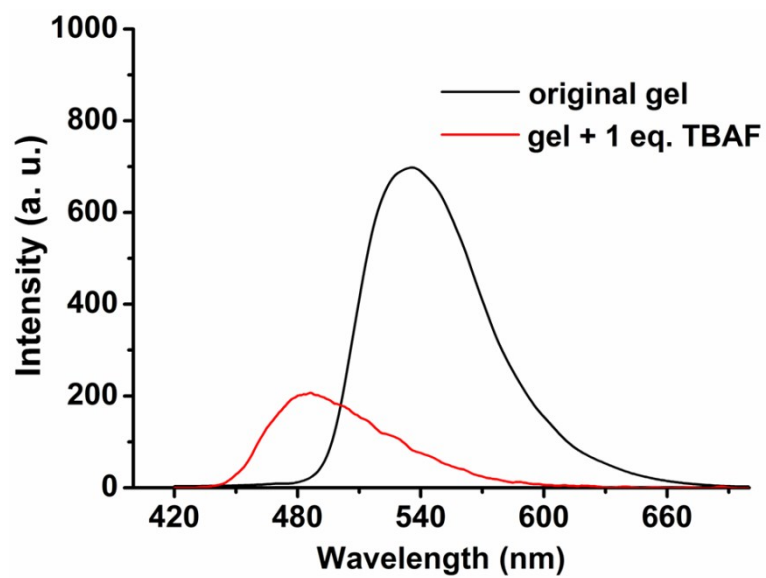

Fig. S9 Emission spectra of **BAPBIA** gel (8 mg/ml) before and after adding 1 equiv. TBAF ( $\lambda_{\text{ex}} = 400$  nm).
